# Supplementary material for: Cell-Free Extracts from Probiotics Modulate miR-21 and miR-155 and Tumor Suppressors PDCD4 and PTEN in Breast Cancer
Source: Research Square preprint supplement (doi:10.21203/rs.3.rs-8065664/v1), 2025-12-22
Supplement: Supplementary file 1 [file 8fb9b6a56477396addf51a2d.docx]

**Table 1.** Primer sequences used for the real time PCR of the genes

| **Gene** | **NCBI**  **Accession number** | **Primer Sequence** |
| --- | --- | --- |
| PDCD4 | NM_014456.5 | F: CTCCTAGAGCACCACAGTTG |
| R: CGGTAGCCTTATCCAGAGCA |
| *BRCA2* | OR676874.1 | F: ACTCCCACATACCACTGACTT |
| R: GATGATGTTTCCTGTCCACTTCTAA |
| *PFN2* | NM_002628 | F: GTCATTCAGAGCATTACGCCAA |
| R: CACGCCAAGAGTCAAACCG |
| *PTEN* | NM_000314 | F: GAACAAGATGCTAAAAAAGGACAAAATG |
| R: CACGCTCTATACTACAAATGCTATCG |
| *B2M* | NM_004048 | F: AGATGAGTATGCCTGCCGTGT |
| R: TGCGACATCTTCAAACCTCCAT |

**Table 2.** Primer sequences used for the real time PCR of miRNAs

| **Gene** | **mirBase**  **Accession number** | **Primer Sequence** |
| --- | --- | --- |
| *hsa-mir-223-3p* | MIMAT0000280 | F: GAGAGGGGTGTCAGTTTGTC |
| R: GTGCAGGGTCCGAGGT |
| *hsa-mir-21-5p* | MIMAT0000076 | F: GGCGTAGCTTATCAGACTG |
| R: GTGCAGGGTCCGAGGT |
| *hsa-mir-150-5p* | MIMAT0000451 | F: GGTCCAGTTAATGCTAATCGTGA |
| R: GTGCAGGGTCCGAGGT |
| *hsa-mir-155-5p* | MIMAT0000646 | F: GGCTGGTTAATGCTAATCGTGA |
| R: GTGCAGGGTCCGAGGT |
| *U6* | NR-004394 | F: GCAAGGATGACACGCAAATTC |
| R: GTGCAGGGTCCGAGGT |
